# Supplementary material
Source: publisher site journal article supplement (https://www.dovepress.com/article/566348)
Supplement: Supplementary file 1 [file 566348_Supplementary%20Material_1.docx]

**Supplementary Material: Newcastle-Ottawa Scale (NOS) Assessment Guide**

1. **Introduction**

The Newcastle-Ottawa Scale (NOS) is a standardized tool for assessing the quality of non-randomized studies, such as cohort and cross-sectional studies, in systematic reviews 1. It evaluates methodological rigor across three domains: selection of study groups, comparability of groups, and ascertainment of outcomes. This document outlines the NOS criteria, scoring methodology, and its application in the systematic review comparing the impact of e-cigarettes and traditional cigarettes on asthma in adolescents, including a detailed table of NOS scores for included studies.

1. **NOS Criteria**

The NOS is adapted to study design, with distinct criteria for cohort and cross-sectional studies. Each domain includes specific items, with a maximum score of 9 (cohort) or 10 (cross-sectional) stars.

1. **Cohort Studies**

The NOS for cohort studies includes eight items across three domains:

- 1. **Selection (4 stars)**
     1. **Representativeness of the exposed cohort**: Truly or somewhat representative (1 star); not representative or unclear (0 stars).
     2. **Selection of the non-exposed cohort**: Drawn from the same community (1 star); different source or unclear (0 stars).
     3. **Ascertainment of exposure**: Secure records or structured interview (1 star); self-report or unclear (0 stars).
     4. **Demonstration that outcome was not present at start**: Outcome (e.g., asthma) absent at baseline (1 star); not confirmed or unclear (0 stars).
  2. **Comparability (2 stars)**
     1. **Comparability of cohorts**: Controls for primary confounder (e.g., age, sex; 1 star) and additional confounders (e.g., race, household exposure; 1 star); no adjustment (0 stars).
  3. **Outcome (3 stars)**
  4. **Assessment of outcome**: Independent blind assessment or record linkage (1 star); self-report or unclear (0 stars).
  5. **Follow-up long enough for outcomes**: Sufficient duration (e.g., ≥1 year; 1 star); inadequate or unclear (0 stars).
  6. **Adequacy of follow-up**: Complete follow-up or minimal loss (<20%; 1 star); high loss or unclear (0 stars).
  7. **Maximum score**: 9 stars.

1. **Cross-Sectional Studies**

The NOS for cross-sectional studies, adapted by Herzog et al. (2013)2, includes seven items:

- 1. **Selection (5 stars)**
     1. **Representativeness of the sample**: Truly or somewhat representative (1 star); selected group or unclear (0 stars).
     2. **Sample size**: Justified (e.g., power calculation; 1 star); not justified or unclear (0 stars).
     3. **Non-respondents**: Response rate ≥80% or non-respondents similar (1 star); low response or unclear (0 stars).
     4. **Ascertainment of exposure**: Validated tool (2 stars); non-validated but clear (1 star); unclear (0 stars).
  2. **Comparability (2 stars)**
     1. **Comparability of subjects**: Controls for primary confounder (1 star) and additional confounders (1 star); no adjustment (0 stars).
  3. **Outcome (3 stars)**
     1. **Assessment of outcome**: Independent assessment or validated tool (2 stars); self-report (1 star); unclear (0 stars).
     2. **Statistical test**: Appropriate and clearly described (1 star); inappropriate or unclear (0 stars).
  4. **Maximum score**: 10 stars.

1. **Scoring Methodology**

Each item is assigned 0–2 stars based on predefined criteria. Total scores are summed across domains and interpreted as:

- **≥7 stars**: High quality (low risk of bias).
- **5–6 stars**: Moderate quality.
- **<5 stars**: Low quality (high risk of bias).

Two reviewers independently assess studies, resolving discrepancies through consensus to ensure reliability.

1. **Application in the Systematic Review**

The NOS was applied to 10 studies (1 cohort, 9 cross-sectional) included in the systematic review on e-cigarettes, traditional cigarettes, and asthma in adolescents. The cohort study (Xie et al., 2020 [PATH]) was evaluated using cohort criteria, while the cross-sectional studies (Yao et al., 2024; Williams et al., 2023; Balan et al., 2023; Alanazi et al., 2022; Veldhuis et al., 2021; Vasileiadou et al., 2021; Xie et al., 2020 [YRBS]; Wills et al., 2020; Alnajem et al., 2020) used cross-sectional criteria. Scores ranged from 6 to 8, indicating moderate to high quality. The Supplementary Table 1 summarizes NOS scores for each study.

1. **Scoring Notes**

- **Selection**: Most studies scored 3–4 due to representative sampling (e.g., PATH, YRBS) and validated exposure tools. Lower scores (e.g., Alanazi et al., 2022; Xie et al., 2020 [YRBS]) reflected unjustified sample sizes or unclear response rates.
- **Comparability**: Scores of 1–2 reflected adjustment for confounders like age, sex, race, and household exposure. Alanazi et al. (2022) and Xie et al. (2020 [YRBS]) scored 1/2 due to limited adjustments.
- **Outcome**: Self-reported asthma lowered scores to 1/2 for outcome assessment in all studies. Statistical tests were appropriate, earning 1/1.
- **Example (Alnajem et al., 2020)**: Representative school-based sample (1 star), justified sample size (1 star), response rate unclear (0 stars), validated exposure questionnaire (2 stars), adjusted for confounders (2 stars), self-reported asthma (1 star), appropriate statistics (1 star). Total: 8/10.
- **Example (Xie et al., 2020 [PATH])**: Representative cohort (1 star), same community non-exposed (1 star), structured exposure survey (1 star), asthma absent at baseline (1 star), adjusted confounders (2 stars), self-reported outcome (0 stars), adequate follow-up (1 star), minimal loss (1 star). Total: 8/9.

Lower outcome scores across studies were due to reliance on self-reported asthma, common in large surveys. High selection and comparability scores reflected robust sampling and confounder adjustment.

1. **Conclusion**

The NOS provided a rigorous framework for quality assessment in this review. Scores of 6–8/10 indicate reliable studies, though self-reported outcomes warrant cautious interpretation. The Supplementary Table 1 enhances transparency, detailing how each study was evaluated.

**References** **(Supplementary)**

1. Wells GA, Shea B, O’Connell D, et al. The Newcastle-Ottawa Scale (NOS) for assessing the quality of nonrandomised studies in meta-analyses. Published online 2000.

2. Herzog R, Álvarez-Pasquin MJ, Díaz C, Del Barrio JL, Estrada JM, Gil Á. Are healthcare workers’ intentions to vaccinate related to their knowledge, beliefs and attitudes? A systematic review. *BMC Public Health*. 2013;13(1):154.

**Supplementary Table 1.** NOS Scores for Included Studies

| **Study** | **Study Type** | **Selection** | **Comparability** | **Outcome** | **Total Score** |
| --- | --- | --- | --- | --- | --- |
| Yao et al., 2024 10 | Cross-sectional | 4/5 | 2/2 | 2/3 | 8/10 |
| Williams et al., 2023 14 | Cross-sectional | 3/5 | 2/2 | 2/3 | 7/10 |
| Balan et al., 2023 16 | Cross-sectional | 4/5 | 2/2 | 2/3 | 8/10 |
| Alanazi et al., 2022 17 | Cross-sectional | 3/5 | 1/2 | 2/3 | 6/10 |
| Veldhuis et al., 2021 18 | Cross-sectional | 3/5 | 2/2 | 2/3 | 7/10 |
| Vasileiadou et al., 202132 | Cross-sectional | 3/5 | 2/2 | 2/3 | 7/10 |
| Xie et al., 2020 [YRBS] 30 | Cross-sectional | 3/5 | 1/2 | 2/3 | 6/10 |
| Xie et al., 2020 [PATH] 31 | Cohort | 4/4 | 2/2 | 2/3 | 8/9 |
| Wills et al., 2020 13 | Cross-sectional | 4/5 | 2/2 | 2/3 | 8/10 |
| Alnajem et al., 2020 15 | Cross-sectional | 4/5 | 2/2 | 2/3 | 8/10 |

| Supplementary Table 2. Characteristics and outcomes of included studies | | | | | | | | | | | | | | | | | | | | | | | | | |
| --- | --- | --- | --- | --- | --- | --- | --- | --- | --- | --- | --- | --- | --- | --- | --- | --- | --- | --- | --- | --- | --- | --- | --- | --- | --- |
| No. | | **Study (Author, Year)** | **Study Design** | | **Population** | | **Intervention/Comparison** | | | **Asthma Outcomes** | | **Results** | | **Adjusted Variables** | | **Statistical Methods** | | **Study Quality (NOS)** | **Limitations** | | | **Notes** | |  | |
| 1 | | Yao et al., 2024 10 | Cohort (Models 1-3); Cross-sectional (Model 4) | | N=11,748 (Models 1-2), N=9,422 (Model 3), N=2,421 (Model 4); Age 12-17 years; USA (nationally representative, PATH Study) | | Past 30-day use: Never tobacco (75.5%), sole cigarette/cigar (1.6%), sole e-cigarette (5.1%), dual use (1.4%), other tobacco (16.5%); pairwise comparisons for e-cig vs. cigarette | | | Self-reported new asthma diagnosis (Model 3); self-reported asthma with interference in activities (none/little, some, most/all; Model 4) | | **Model 3 (New asthma)**: Sole cigarette/cigar: AOR=2.23 (0.82-6.09, p=0.12); Sole e-cig: AOR=0.37 (0.07-1.87, p=0.23); Dual use: AOR=1.47 (0.30-7.16, p=0.63). **Model 4 (Asthma interference)**: Sole cigarette/cigar: AOR=8.49 (2.59-27.81, p<0.01, most/all); Sole e-cig: AOR=1.17 (0.26-5.34, p=0.84); Dual use: AOR=13.07 (5.00-34.16, p<0.0001, most/all), AOR=3.64 (1.07-12.38, p=0.04, some). Pairwise: Dual vs. sole e-cig: AOR=11.11 (p=0.00, most/all). | | Sex, age (12-14 vs. 15-17), race/ethnicity, household income, parents' education, home tobacco rules, living with tobacco user, cannabis use, baseline symptoms (wheezing for Model 1, cough for Model 2) | | Multivariable logistic regression (Models 1-3); Multinomial logistic regression (Model 4); Chi-squared tests; PATH longitudinal weights; Fay’s balanced repeated replication | | 8/9 (High; Selection: 4/4, Comparability: 2/2, Outcome: 2/3 due to self-reported outcomes) | Self-reported outcomes (no clinical confirmation); Model 4 cross-sectional (no causality); Combined cigarette/cigar group may dilute effects; No chemical composition data for e-cigs; No dose/frequency data | | | Direct comparison (dual vs. sole e-cig) shows higher risk for dual use; Asthma data limited to diagnosis and interference; No specific adolescent asthma severity/type reported | |  | |
| 2 | | Williams et al., 2023 14 | Cross-sectional | | N=150,634; 10th & 12th graders (mean age 16.2 years, SD=1.1); California, USA (representative, CSTS 2019-2020) | | Ever use: Nonuse (63.3%), E-cig only (4.7%), Cig only (0.6%), Cannabis only (10.9%), Dual E-cig+Cig (0.4%), Dual E-cig+Cannabis (14.7%), Dual Cig+Cannabis (0.9%), Triple (4.5%); E-cig: vaping nicotine/flavorings; Cig: combustible tobacco; Cannabis: smoking/vaping | | | Self-reported: Lifetime Asthma (ever diagnosed by doctor/nurse, 19.7%); Recent Asthma (attack in past 12 months, 3.6% total sample) | | **Lifetime Asthma**: E-cig only: AOR=1.10 (1.02-1.18, p<0.01); Cig only: AOR=0.80 (0.60-1.05, ns); Cannabis only: AOR=1.17 (1.11-1.23, p<0.0001); Dual E-cig+Cig: AOR=0.71 (0.52-0.96, p<0.05, inverse); Dual E-cig+Cannabis: AOR=1.17 (1.12-1.23, p<0.0001); Dual Cig+Cannabis: AOR=1.15 (0.95-1.40, ns); Triple: AOR=1.14 (1.06-1.24, p<0.001). **Recent Asthma**: E-cig only: AOR=1.12 (0.97-1.28, ns); Cig only: AOR=0.79 (0.43-1.45, ns); Cannabis only: AOR=1.13 (1.02-1.26, p<0.05); Dual E-cig+Cig: AOR=0.68 (0.35-1.32, ns); Dual E-cig+Cannabis: AOR=1.09 (1.00-1.19, marginal); Dual Cig+Cannabis: AOR=1.30 (0.90-1.88, ns); Triple: AOR=1.19 (1.03-1.37, p<0.01). | | Age, sex, parental education, race/ethnicity (White as ref.), household smoking, household vaping, household cannabis use | | Multinomial logistic regression; SAS Proc SURVEYFREQ (weighted, clustered); Cross-tabulation; Proc GLM for missed school days; Listwise deletion | | 7/10 (Good; Selection: 4/5, Comparability: 2/2, Outcome: 1/3 due to self-reported outcomes) | Cross-sectional (no causality); Self-reported asthma (no clinical confirmation); No data on asthma onset/frequency; Recent Asthma definition may differ; Low cigarette prevalence limits power | | | E-cig only associated with Lifetime Asthma, not Cig only; High E-cig+Cannabis co-occurrence (14.7%); Motives analysis (medical/health for cannabis in asthma group) does not support reverse causation; Missed school days validate asthma reports | |  | |
| 3 | | Balan et al., 2023 16 | Retrospective cross-sectional/case-control | | 312,979 participants (≥12 years), NHANES 2013-2018, USA; 11.43% with asthma history, 1.51% with ED visits due to asthma, 2.90% with asthma attacks in past year | | Active smoking (cigarettes, e-cigarettes, cigars, smokeless tobacco); passive smoking (≥1 smoker in household, indoor exposure in home/work/bar); cigarette length (regular, king-sized, long, ultra-long); non-smokers as reference | | | Asthma attacks in past year (MCQ040); Emergency care visits for asthma in past year (MCQ050) | | - Prevalence: 46.2% traditional smoking, 26.63% e-cigarette use, 37.53% passive smoking among ED asthma group vs. 36.97%, 24.80%, 24.16% in overall asthma group (p<0.0001).<br>- Adjusted Odds Ratios (AOR): <br> - Daily cigarette use: AOR=1.12 (95% CI: 1.009-1.260, p=0.025) for asthma exacerbation.<br> - E-cigarette use: AOR=2.13 (95% CI: 1.92-2.36, p<0.0001).<br> - Cigar use: AOR=1.20 (95% CI: 1.09-1.33, p<0.0001).<br> - Ultra-long cigarettes: AOR=4.85 (95% CI: 3.33-7.06, p<0.0001).<br> - Passive smoking (≥1 smoker in household): AOR=5.25 (95% CI: 3.43-8.06, p<0.001).<br> - Smokeless tobacco: AOR=0.69 (non-significant, no increased risk).<br>- Higher serum hydroxycotinine levels correlated with asthma severity (p<0.0001). | | Age, gender, race, ethnicity, household income, comorbidities (COPD, emphysema, chronic bronchitis, hypercholesterolemia, diabetes, hypertension, coronary heart disease, obesity, alcohol/substance use disorders) | | Univariate: Mean/SD for continuous variables, prevalence/proportions for categorical; t-test, chi-square test. Multivariable: Logistic regression for adjusted/unadjusted ORs; 10% rule and Hosmer-Lemeshow for model fit | | 7/10 (Selection: 4/4; Comparability: 1/2; Outcome: 2/3; cross-sectional, self-reported data, no temporality) | - Cross-sectional design (no causality/temporality).<br>- Self-reported outcomes (recall bias, geographical inconsistency).<br>- Limited data on asthma severity, pulmonary function, imaging, disease control.<br>- No analysis of past vs. current smoking or ED visits as a specific outcome.<br>- Restricted data on time/sample weights. | | | - First study to assess cigarette length and smoking initiation age in asthma outcomes.<br>- Large sample size enhances generalizability.<br>- ID to be confirmed from list (51, 56, 57, 86, 110, 168, 219, 236, 279, 401). | |  | |
| 4 | | Alanazi et al., 2022 17 | Cross-sectional | | 283 youth and young adults (15-25 years), Alabama, USA; 151 with clinically diagnosed asthma (ICD-10), 132 without asthma or chronic pulmonary disease (reference group) | | E-cigarette use (susceptibility: yes/no; current use: yes/no); mediators: anxiety, depression, impulsivity; moderators: alcohol and cannabis use (past 30 days); reference: non-users | | | None directly measured (focus on e-cigarette use as outcome, not asthma-specific outcomes like exacerbations or ED visits) | | - Susceptibility to e-cigarette use: 35.8% in asthma group vs. 59.8% in reference group (p<0.001).<br>- Current e-cigarette use: 6.0% in asthma group vs. 18.2% in reference group (p=0.002).<br>- Direct effect of asthma on susceptibility: β=-1.122 (SE=0.317, 95% CI: -1.743, -0.502, p<0.001).<br>- Direct effect of asthma on current use: β=-1.371 (SE=0.576, 95% CI: -2.500, -0.243, p<0.05).<br>- Mediation: Anxiety, depression, impulsivity not significant mediators (total indirect effect: β=-0.018, SE=0.100, 95% CI: -0.217, 0.184 for susceptibility; β=-0.092, SE=0.143, 95% CI: -0.397, 0.172 for current use).<br>- Moderation: Frequency of cannabis use (past 30 days) moderated susceptibility (β=-2.03, SE=1.05, p=0.046); higher cannabis use linked to lower susceptibility in asthma group. Alcohol use not a moderator. | | Age, gender, race, education, current tobacco cigarette use | | Descriptive: Mean/SD, t-tests, chi-square. Mediation: Structural equation modeling (SEM) with maximum likelihood estimation, 10,000 bootstrapped samples. Moderation: Logistic regression | | 6/10 (Selection: 3/4; Comparability: 1/2; Outcome: 2/3; small sample, cross-sectional, no temporality) | - Small sample size (n=283) limits generalizability.<br>- Cross-sectional design (no causality/temporality).<br>- Limited to youth (15-25 years), not generalizable to older adults.<br>- No differentiation of cannabis use methods (vaping, smoking, ingestion).<br>- No direct asthma outcomes (e.g., exacerbations, ED visits).<br>- Potential selection bias (clinic-based asthma group vs. community reference group). | | | - First study to explore mediation (anxiety, depression, impulsivity) and moderation (substance use) in asthma and e-cigarette use.<br>- Clinically diagnosed asthma enhances validity.<br>- ID to be confirmed from list (51, 56, 57, 86, 110, 168, 219, 236, 279, 401). | |  | |
| 5 | | Veldhuis et al., 2021 18 | Cross-sectional | | 30,113 adolescents (grades 9-12), USA, YRBS 2015 and 2017; 50.7% female; 88.2% heterosexual, 1.9% lesbian/gay, 6.6% bisexual, 3.2% unsure/unknown; 21.0% ever diagnosed with asthma | | Inhaled substance use (cigarettes, cigars/cigarillos, marijuana, electronic vapor products, inhalants, synthetic marijuana); sexual identity (heterosexual, lesbian/gay, bisexual, unsure/unknown); reference: heterosexual non-users | | | Ever diagnosed with asthma (self-reported: "Has a doctor or nurse ever told you that you have asthma?") | | - Asthma prevalence: 28.1% lesbian/gay, 26.2% bisexual, 21.0% heterosexual, 16.1% unsure/unknown.<br>- Relative Risk Ratios (RRR):<br> - Lesbian female: RRR=1.42 (95% CI: 1.00-2.02).<br> - Bisexual female: RRR=1.26 (95% CI: 1.04-1.53).<br> - Gay male: RRR=1.74 (95% CI: 1.27-2.39).<br> - Bisexual male: RRR=1.68 (95% CI: 1.19-2.40).<br>- Inhaled substance use: Higher among lesbian/bisexual females (RRR=1.61-2.89) vs. heterosexual females; limited differences in males.<br>- Moderation: Synthetic marijuana use moderated asthma in lesbian females (RRR=5.88, 95% CI: 2.10-16.60 vs. RRR=1.38, 95% CI: 1.02-1.87 in heterosexual females).<br>- Mediation: Inhaled substances mediated 12% of asthma risk in lesbian females, 9% in bisexual females; partially mediated (12% gay, 7% bisexual) in males.<br>- Asthma associations: Cigarettes (RRR=1.41 females, 1.35 males), cigars (RRR=1.58 females, 1.35 males), e-vapor (RRR=1.46 females, 1.28 males), inhalants (RRR=1.51 females, 1.88 males), synthetic marijuana (RRR=1.66 males). | | Age, race/ethnicity, BMI percentile | | Descriptive: Counts, percentages. Multinomial logistic regression for RRRs; PROC SURVEYLOGISTIC/SURVEYFREQ for survey design/weights; mediation proportion calculated via coefficient changes | | 7/10 (Selection: 4/4; Comparability: 1/2; Outcome: 2/3; self-reported asthma, cross-sectional) | - Self-reported asthma (no clinical confirmation, no current asthma data).<br>- Cross-sectional design (no temporality/causality).<br>- No transgender identity data.<br>- Excludes out-of-school youth (underestimates prevalence).<br>- Limited to ever-use for inhalants/synthetic marijuana.<br>- No asthma severity/control data. | | | - First study to examine sexual identity, inhaled substances, and asthma in SMY.<br>- Large, representative sample.<br>- ID to be confirmed from list (51, 56, 57, 86, 110, 168, 219, 236, 279, 401). | |  | |
| 6 | Vasileiadou et al., 2021 32 | | | Cross-sectional (repeated surveys, 2008 and 2016) | | 4,627 young adults (16-25 years), Western Sweden; 2,143 in 2008 (56.6% female), 2,484 in 2016 (56.9% female) | | Tobacco smoking, e-cigarette use (2016 only), snus use; comparison: non-smokers, non-users | Current asthma (physician-diagnosed OR ever asthma AND asthma medication, shortness of breath, recurrent wheeze, or any wheeze in past 12 months); ever asthma | | - Current asthma increased: 9.3% (2008) to 11.5% (2016), p=0.014; aOR=1.27 (95% CI: 1.04-1.53, basic model).<br>- Significant in males without AR (aOR=1.83, 95% CI: 1.09-3.07) and male smokers (aOR=3.02, 95% CI: 1.12-8.13).<br>- Ever asthma increased: 11.2% to 15.3%, p<0.001; aOR=1.39 (95% CI: 1.15-1.68).<br>- Current smoking decreased: 20.3% to 15.2%, p<0.001; more in females (23.5% to 16.2%, p<0.001).<br>- E-cigarette use (2016): 4.8%, mostly males (6.6% vs. 3.4%); 60.7% also smoked tobacco; 67.2% of dual users were heavy smokers.<br>- Growing up on a farm reduced current asthma risk: aOR=0.26 (95% CI: 0.81-0.84, 2008); aOR=0.47 (95% CI: 0.23-0.996, 2016).<br>- Family history increased asthma risk: aOR=3.14 (2008), 4.03 (2016). | | Cohort, gender, age, urban/rural living, family history of asthma/allergy, farm living, current smoking, occupational exposure, education | | Frequencies, chi-square, ANOVA; binary logistic regression for aORs; interaction analyses | | 7/10 (Selection: 4/4; Comparability: 1/2; Outcome: 2/3; self-reported data, lower response rate in 2016) | | | - Self-reported outcomes (no clinical validation).<br>- Lower response rate in 2016 (35% vs. 50% in 2008), potential bias.<br>- Non-responder bias (young males, smokers less likely to respond).<br>- Cross-sectional design (no temporality/causality).<br>- E-cigarette use only assessed in 2016.<br>- No asthma severity/control data. | - Large, population-based cohorts.<br>- Validated questionnaires.<br>- ID to be confirmed from list (51, 56, 57, 86, 110, 168, 219, 236, 279, 401). | |  | |
| 7 | | Xie et al., 2020 30 | Prospective cohort (2013-2018, PATH study, waves 1-4) | | 21,618 US adults (≥18 years), no prevalent respiratory conditions at baseline; 49.1% male, 65.2% non-Hispanic White; mean pack-years 6.7 | | e-Cigarette use (never, former, current) at baseline; comparison: never users | | | Incident asthma (physician-diagnosed in past 12 months); composite respiratory disease (COPD, emphysema, chronic bronchitis, asthma) | | - Incident asthma cases: 804; composite respiratory disease: 1,460 (6.8%).<br>- Ever e-cigarette use increased asthma risk: IRR=1.24 (95% CI: 1.01-1.53).<br>- Former e-cigarette users: IRR=1.19 (95% CI: 0.95-1.50); current users: IRR=1.31 (95% CI: 1.01-1.71).<br>- Composite respiratory disease: former users IRR=1.28 (95% CI: 1.09-1.51), current users IRR=1.31 (95% CI: 1.08-1.59).<br>- In healthy respondents (good/excellent health): former users IRR=1.21 (95% CI: 1.00-1.47), current users IRR=1.43 (95% CI: 1.14-1.80).<br>- In respondents with no chronic conditions: current users IRR=1.40 (95% CI: 1.09-1.79).<br>- Current e-cigarette use associated with chronic bronchitis (IRR=1.33, 95% CI: 1.06-1.67), emphysema (IRR=1.69, 95% CI: 1.15-2.49), COPD (IRR=1.57, 95% CI: 1.15-2.13).<br>- Highest risk in daily users, those starting <25 years, and established users. | | Age, sex, race/ethnicity, education, US census region, cigarette smoking history, other combustible tobacco use (cigar, cigarillo, pipe, hookah), illicit drug use (heroin, inhalants, hallucinogens), BMI, chronic conditions (hypertension, cholesterol, heart failure, stroke, diabetes) | | Poisson regression for IRRs; multiple imputation for missing data; survey weights (wave 2); sensitivity analyses (listwise deletion, replicate weights, panel weights, non-smokers) | | 8/10 (Selection: 4/4; Comparability: 2/2; Outcome: 2/3; self-reported outcomes, short follow-up) | - Self-reported e-cigarette use and respiratory outcomes (recall bias).<br>- Short follow-up (2013-2018), limiting long-term effects.<br>- Observational design (no causality).<br>- No time-varying exposure/confounding.<br>- Missing data on e-cigarette device characteristics (e.g., flavor, generation).<br>- No serial pulmonary function tests. | | | - Large, nationally representative cohort.<br>- Comprehensive adjustment for smoking/other tobacco.<br>- Extensive sensitivity analyses for reverse causality.<br>- ID to be confirmed from list (51, 56, 57, 86, 110, 168, 219, 236, 279, 401). | |  | |
| 8 | | Xie et al., 2020 31 | Cross-sectional (secondary analysis of YRBSS 2017) | | 12,747 US high school students (aged 12–18 years); 52.4% NHW, 22.3% Hispanic, 13.1% NHB, 12.1% other/multi-race; 65.2% never ENDs users, 21.6% ever users, 13.2% current users | | ENDs use: Never (no lifetime use), Ever (lifetime use, no past 30-day use), Current (past 30-day use); Comparison: Never users as reference | | | Self-reported asthma history (yes/no) | | - **Overall asthma prevalence**: Current users: 27.2% (95% CI: 23.0–31.4); Ever users: 22.4% (95% CI: 19.6–25.3); Never users: 20.2% (95% CI: 18.4–22.0); P=.003. - **By ethnicity (current users)**: NHB: 38.3% (95% CI: 30.2–46.4); NHW: 26.3% (95% CI: 20.7–31.9); Hispanic: 28.0% (95% CI: 19.6–36.4); Other: 22.4% (95% CI: 13.8–30.9); NHB significantly higher than NHW (P<.05). - **By ethnicity (ever users)**: NHB: 29.9% (95% CI: 24.0–35.9); significantly higher than NHW (21.3%, P<.01). - **ENDs use prevalence**: Current users: NHW (63.5%), Hispanic (18.3%), NHB (8.3%), Other (9.9%); P<.001. | | None (unadjusted prevalence estimates) | | Weighted prevalence estimates with 95% CI; χ² tests for group comparisons; SAS 9.4 with complex sampling (strata, cluster, weight); P<.05 | | 7/10 (Selection: 4/4; Comparability: 1/2; Outcome: 2/3; self-reported data, cross-sectional) | - Self-reported asthma and ENDs use (potential recall bias). - Cross-sectional design (no causality or temporality). - No adjustment for confounders (e.g., age, sex, smoking). - Limited focus on ethnic disparities without exploring reasons. - No data on asthma severity or control. | | | - Secondary analysis of YRBSS 2017 data. - Large, nationally representative sample. - Highlights ethnic disparities (NHB highest asthma prevalence). - Builds on Wills et al., 2020 findings. - ID to be confirmed from list (51, 56, 57, 86, 110, 168, 219, 236, 279, 401). | |  | |
| 9 | | Wills et al., 2020 13 | Cross-sectional (2017 YRBSS) | | 12,672 US high school students (9th–12th grade, mean age 16.0 years, SD=1.2); 51% female; 54% non-Hispanic White, 14% non-Hispanic Black, 10% Hispanic, 4% non-Hispanic Asian, 13% multirace (Hispanic), 6% multirace (non-Hispanic) | | E-cigarette use (ever, current); comparison: non-users | | | Self-reported asthma diagnosis by a health professional (yes/no) | | - Ever e-cigarette use: AOR=1.15 (95% CI: 1.02–1.30, p=0.02). - Current e-cigarette use: AOR=1.30 (95% CI: 1.10–1.53, p=0.002). - Current cigarette smoking: AOR=1.24 (95% CI: 1.03–1.51, p=0.03). - Obesity: AOR=1.48 (95% CI: 1.30–1.68, p<0.0001). - Asthma prevalence: 24% overall; exclusive e-cigarette users (current): 29%, dual users (current): 31%, non-users: 23%. - Ethnic differences: lower asthma prevalence for non-Hispanic Asian (15%, p=0.02) and Hispanic (19%, p=0.03); higher for non-Hispanic Black (30%, p<0.0001) and non-Hispanic multirace (34%, p<0.0001) vs. non-Hispanic White (23%). - Additive effect of e-cigarettes beyond smoking: significant in sensitivity analysis (p=0.03). | | Age, gender, race/ethnicity, overweight status, obesity status, cigarette smoking, marijuana use | | Logistic regression; survey weights and adjustment for stratum/school clustering in SAS v9.3; cross-tabulation (Rao-Scott χ²); sensitivity analysis for additive effects | | 7/10 (Selection: 3/4; Comparability: 2/2; Outcome: 2/3; self-reported data, cross-sectional design) | - Self-reported asthma and e-cigarette use (recall bias). - Cross-sectional design (no causality). - No data on current asthma status (may underestimate effects). - No data on e-cigarette device type, second-hand smoke, or household conditions. - Possible underreporting of JUUL use (not explicitly mentioned in YRBS). | | | - Nationally representative sample. - Controlled for cigarette smoking and marijuana use. - ID to be confirmed from list (51, 56, 57, 86, 110, 168, 219, 236, 279, 401). | |  | |
| 10 | | Alnajem et al., 2020 15 | Cross-sectional | | 1,345 high school students (11th–12th grade, aged 16–19 years) in Kuwait; 51.8% female; analytical sample from 1,565 enrolled; stratified by school district and sex | | E-cigarette use (never, former, current [past 30 days]); household SHA exposure (none [0 days], infrequent [1–2 days], frequent [≥3 days]); comparison: never users/no SHA exposure | | | Current wheeze (past 12 months), current asthma (doctor-diagnosed + wheeze/medication in past 12 months), current uncontrolled asthma symptoms (≥4 wheeze attacks, ≥1 night/week sleep disturbance, and/or speech-limiting wheeze) | | - **E-cigarette use (vs. never e-cigarette & never cigarette)**: - Current e-cigarette only: Current wheeze (aPR=1.54, 95% CI: 1.01–2.45); Current asthma (aPR=1.85, 95% CI: 1.03–3.41); Uncontrolled asthma (aPR=1.56, 95% CI: 0.80–3.06, non-significant). - Dual use (current e-cigarette + current cigarette): Current wheeze (aPR=1.87, 95% CI: 1.44–2.42); Current asthma (aPR=1.92, 95% CI: 1.33–2.76); Uncontrolled asthma (aPR=1.97, 95% CI: 1.35–2.88). - **Household SHA exposure (vs. no exposure)**: - Infrequent (1–2 days): Current wheeze (aPR=1.17, 95% CI: 0.87–1.58); Current asthma (aPR=1.49, 95% CI: 1.01–2.23); Uncontrolled asthma (aPR=1.53, 95% CI: 1.00–2.33). - Frequent (≥3 days): Current wheeze (aPR=1.30, 95% CI: 1.04–1.59); Current asthma (aPR=1.56, 95% CI: 1.13–2.16); Uncontrolled asthma (aPR=1.88, 95% CI: 1.35–2.62). - Prevalence: Current wheeze: 28.3%; Current asthma: 18.0%; Uncontrolled asthma: 16.7%. | | Sex, age, household SHS exposure, household SHA exposure, public place SHS/SHA exposure | | Modified Poisson regression with robust variance estimation (SAS 9.4); chi-square tests for sample comparison; aPRs with 95% CIs | | 8/10 (Selection: 4/4; Comparability: 2/2; Outcome: 2/3; self-reported data, cross-sectional design) | - Self-reported asthma and exposure data (potential information bias). - Cross-sectional design (no causality or temporality). - No data on SHA exposure duration or proximity. - No data on asthma medication adherence. - Potential underreporting of e-cigarette use. | | | - Representative sample from Kuwait public high schools. - Used standardized NYTS and ISAAC questionnaires. - Novel findings on household SHA exposure. - High response rate (99.4%). - ID to be confirmed from list (51, 56, 57, 86, 110, 168, 219, 236, 279, 401). | |  | |
